# Supplementary material for: TP53 protein levels, RNA-based pathway assessment, and race among invasive breast cancer cases
Source: PubMed Central journal article supplement (PMC6018637; doi:10.1038/s41523-018-0067-5), 2018-06-25
Supplement: 41523_2018_67_MOESM1_ESM.pdf [file 41523_2018_67_MOESM1_ESM.pdf]

**Supplemental Table 1. Patient characteristics for CBCS3 participants with TP53 IHC and NanoString (RNA) compared to all CBCS3 participants**

|                   |                      | IHC (N, % <sup>1</sup> ) | RNA (N, % <sup>1</sup> ) | All CBCS3 (N, % <sup>1</sup> ) |
|-------------------|----------------------|--------------------------|--------------------------|--------------------------------|
| Total             |                      | 1,292                    | 1,013                    | 2,998                          |
| Age               |                      |                          |                          |                                |
|                   | ≤50 years            | 606 (28.4)               | 510 (31.0)               | 1,553 (32.0)                   |
|                   | >50 years            | 686 (71.6)               | 503 (69.0)               | 1,446 (68.0)                   |
|                   | p-value <sup>2</sup> | 0.02                     | 0.59                     |                                |
|                   | p-value <sup>3</sup> | 0.18                     |                          |                                |
| Race              |                      |                          |                          |                                |
|                   | White                | 659 (78.1)               | 517 (77.7)               | 1,504 (77.5)                   |
|                   | Black                | 633 (21.9)               | 496 (22.3)               | 1,495 (22.5)                   |
|                   | p-value <sup>2</sup> | 0.66                     | 0.90                     |                                |
|                   | p-value <sup>3</sup> | 0.81                     |                          |                                |
| Menopausal Status |                      |                          |                          |                                |
|                   | Pre                  | 534 (26.2)               | 443 (27.9)               | 1,344 (29.1)                   |
|                   | Post                 | 758 (73.8)               | 570 (72.1)               | 1,655 (70.9)                   |
|                   | p-value <sup>2</sup> | 0.07                     | 0.50                     |                                |
|                   | p-value <sup>3</sup> | 0.38                     |                          |                                |
| Stage             |                      |                          |                          |                                |
|                   | I, II                | 1,107 (87.9)             | 841 (84.4)               | 2,427 (84.7)                   |
|                   | III, IV              | 169 (12.1)               | 166 (15.6)               | 536 (15.3)                     |
|                   | Missing              | 16                       | 6                        | 36                             |
|                   | p-value <sup>2</sup> | 0.02                     | 0.86                     |                                |
|                   | p-value <sup>3</sup> | 0.05                     |                          |                                |
| Node Status       |                      |                          |                          |                                |
|                   | Positive             | 472 (33.0)               | 426 (39.7)               | 1,213 (36.0)                   |
|                   | Negative             | 816 (67.0)               | 584 (60.3)               | 1,776 (64.0)                   |
|                   | Missing              | 4                        | 3                        | 10                             |
|                   | p-value <sup>2</sup> | 0.12                     | 0.09                     |                                |
|                   | p-value <sup>3</sup> | 0.01                     |                          |                                |
| Tumor Size        |                      |                          |                          |                                |
|                   | ≤2cm                 | 729 (63.2)               | 505 (56.1)               | 1,513 (58.7)                   |
|                   | >2cm                 | 531 (36.8)               | 496 (43.9)               | 1,410 (41.3)                   |
|                   | Missing              | 32                       | 12                       | 76                             |
|                   | p-value <sup>2</sup> | 0.02                     | 0.25                     |                                |
|                   | p-value <sup>3</sup> | 0.01                     |                          |                                |
| Tumor Grade       |                      |                          |                          |                                |
|                   | Low-Intermediate     | 685 (65.1)               | 494 (59.0)               | 1,503 (64.8)                   |
|                   | High                 | 527 (34.9)               | 489 (41.0)               | 1,150 (35.2)                   |
|                   | Missing              | 80                       | 30                       | 346                            |
|                   | p-value <sup>2</sup> | 0.87                     | 0.01                     |                                |
|                   | p-value <sup>3</sup> | 0.02                     |                          |                                |
| ER Status         |                      |                          |                          |                                |
|                   | Negative             | 343 (22.0)               | 307 (24.9)               | 889 (24.4)                     |
|                   | Positive             | 918 (78.0)               | 694 (75.1)               | 2,044 (75.6)                   |
|                   | Missing              | 31                       | 12                       | 66                             |
|                   | p-value <sup>2</sup> | 0.14                     | 0.80                     |                                |
|                   | p-value <sup>3</sup> | 0.17                     |                          |                                |
| PR Status         |                      |                          |                          |                                |
|                   | Negative             | 539 (28.5)               | 446 (39.2)               | 1,332 (40.4)                   |
|                   | Positive             | 717 (61.5)               | 548 (60.8)               | 1,594 (59.6)                   |
|                   | Missing              | 36                       | 19                       | 73                             |
|                   | p-value <sup>2</sup> | 0.32                     | 0.61                     |                                |
|                   | p-value <sup>3</sup> | 0.76                     |                          |                                |
| HER2 Status       |                      |                          |                          |                                |
|                   | Negative             | 1,072 (87.4)             | 848 (88.2)               | 2,442 (85.8)                   |
|                   | Positive             | 171 (12.6)               | 139 (11.8)               | 441 (14.2)                     |
|                   | Missing              | 49                       | 26                       | 116                            |
|                   | p-value <sup>2</sup> | 0.24                     | 0.11                     |                                |
|                   | p-value <sup>3</sup> | 0.66                     |                          |                                |
| Triple Negative   |                      |                          |                          |                                |
|                   | No                   | 967 (82.5)               | 737 (79.8)               | 2,184 (81.3)                   |
|                   | Yes                  | 270 (17.4)               | 245 (20.2)               | 687 (18.7)                     |
|                   | Missing              | 55                       | 31                       | 128                            |
|                   | p-value <sup>2</sup> | 0.38                     | 0.39                     |                                |
|                   | p-value <sup>3</sup> | 0.15                     |                          |                                |

<sup>1</sup>Percentages weighted for sampling design

<sup>2</sup>Wald chi-square p-value comparing participants within each TP53 mutation status determination method to all CBCS3 participants

<sup>3</sup>Wald chi-square p-value comparing participants in TP53 IHC to those with NanoString gene expression

**Supplemental Table 2. Agreement between TP53 status as determined by IHC and RNA, CBCS3**

| Overall        |                     |                  |
|----------------|---------------------|------------------|
| RNA            |                     |                  |
| IHC            | TP53 wild type-like | TP53 mutant-like |
| TP53 wild type | 400 (70.0)          | 223 (30.0)       |
| TP53 mutant    | 41 (22.3)           | 179 (77.7)       |

  

| ER+            |                     |                  |
|----------------|---------------------|------------------|
| RNA            |                     |                  |
| IHC            | TP53 wild type-like | TP53 mutant-like |
| TP53 wild type | 376 (78.4)          | 134 (21.6)       |
| TP53 mutant    | 33 (48.7)           | 43 (51.3)        |

  

| ER-            |                     |                  |
|----------------|---------------------|------------------|
| RNA            |                     |                  |
| IHC            | TP53 wild type-like | TP53 mutant-like |
| TP53 wild type | 16 (14.2)           | 87 (85.8)        |
| TP53 mutant    | 8 (4.4)             | 134 (95.6)       |

<sup>1</sup>All percentages weighted for sampling design

**Supplemental Table 3. Proportions of mutant TP53 by race and age within strata of hormone receptor positivity, CBCS3**

| <b>TP53 status</b>                     | <b>All cases<br/>N (%)</b> | <b>Black,<br/>≤50 years<br/>N (%)</b> | <b>Black,<br/>&gt;50 years<br/>N (%)</b> | <b>White,<br/>≤50 years<br/>N (%)</b> | <b>White,<br/>&gt;50 years<br/>N (%)</b> | <b>X<sup>2</sup> p-value</b> |
|----------------------------------------|----------------------------|---------------------------------------|------------------------------------------|---------------------------------------|------------------------------------------|------------------------------|
| <b>IHC</b>                             |                            |                                       |                                          |                                       |                                          |                              |
| ER+ or PR+/HER2- &<br>TP53 mutant      | 90 (11.8)                  | 11 (7.2)                              | 23 (12.6)                                | 28 (13.7)                             | 28 (11.5)                                | 0.20                         |
| ER-/PR-/HER2- &<br>TP53 mutant         | 158 (56.4)                 | 52 (63.7)                             | 57 (60.0)                                | 24 (46.5)                             | 25 (56.8)                                | <0.01                        |
| <b>RNA-based</b>                       |                            |                                       |                                          |                                       |                                          |                              |
| ER+ or PR+/HER2- &<br>TP53 mutant-like | 152 (20.9)                 | 44 (39.9)                             | 42 (32.3)                                | 35 (19.3)                             | 31 (17.5)                                | <0.01                        |
| ER-/PR-/HER2- &<br>TP53 mutant-like    | 224 (92.0)                 | 75 (95.0)                             | 71 (88.8)                                | 41 (87.2)                             | 37 (94.8)                                | <0.01                        |

<sup>1</sup>All percentages weighted for sampling design.
